# Supplementary material for: Angiotensin II-mediated MYH9 downregulation causes structural and functional podocyte injury in diabetic kidney disease
Source: PubMed Central journal article supplement (PMC6531474; doi:10.1038/s41598-019-44194-3), 2019-05-22

Figure 1A

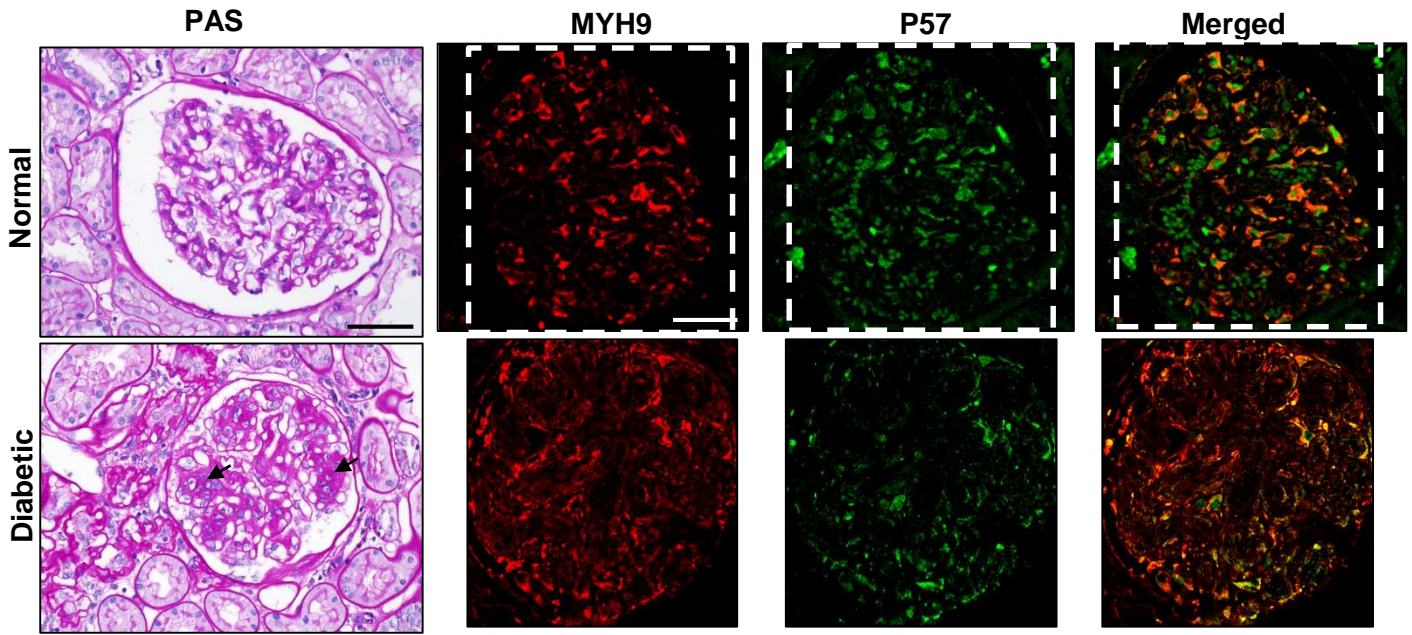

Figure 1D

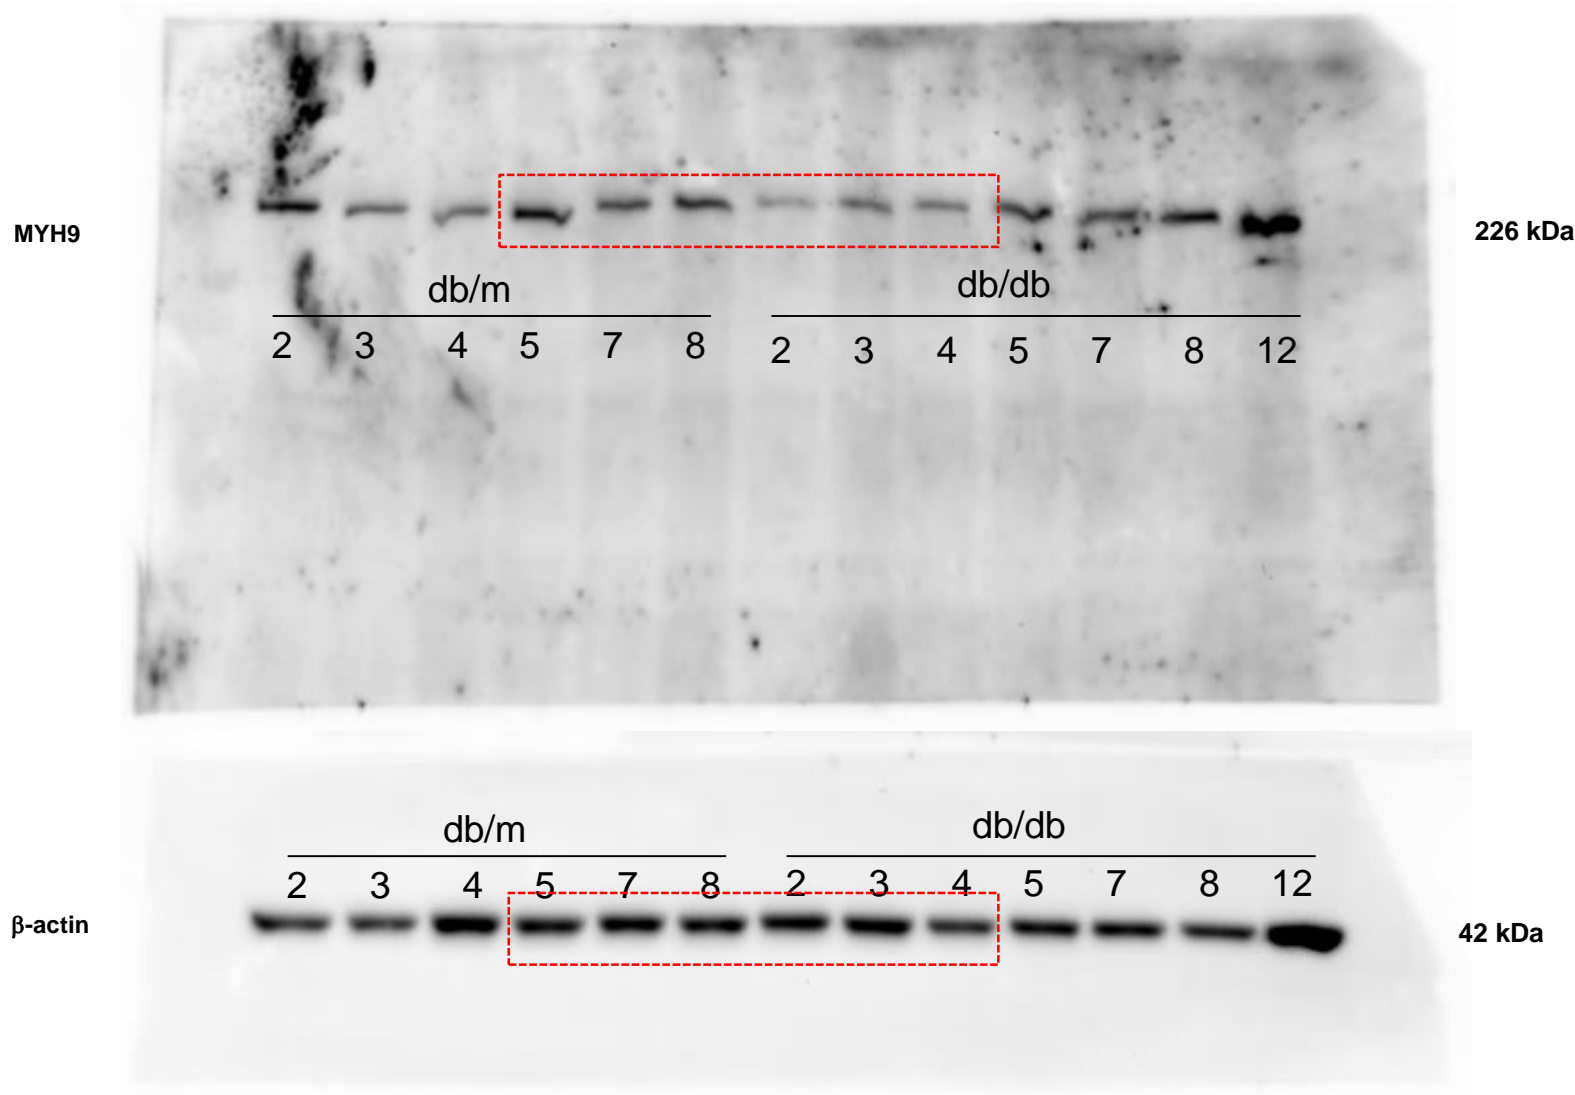

Figure 1E

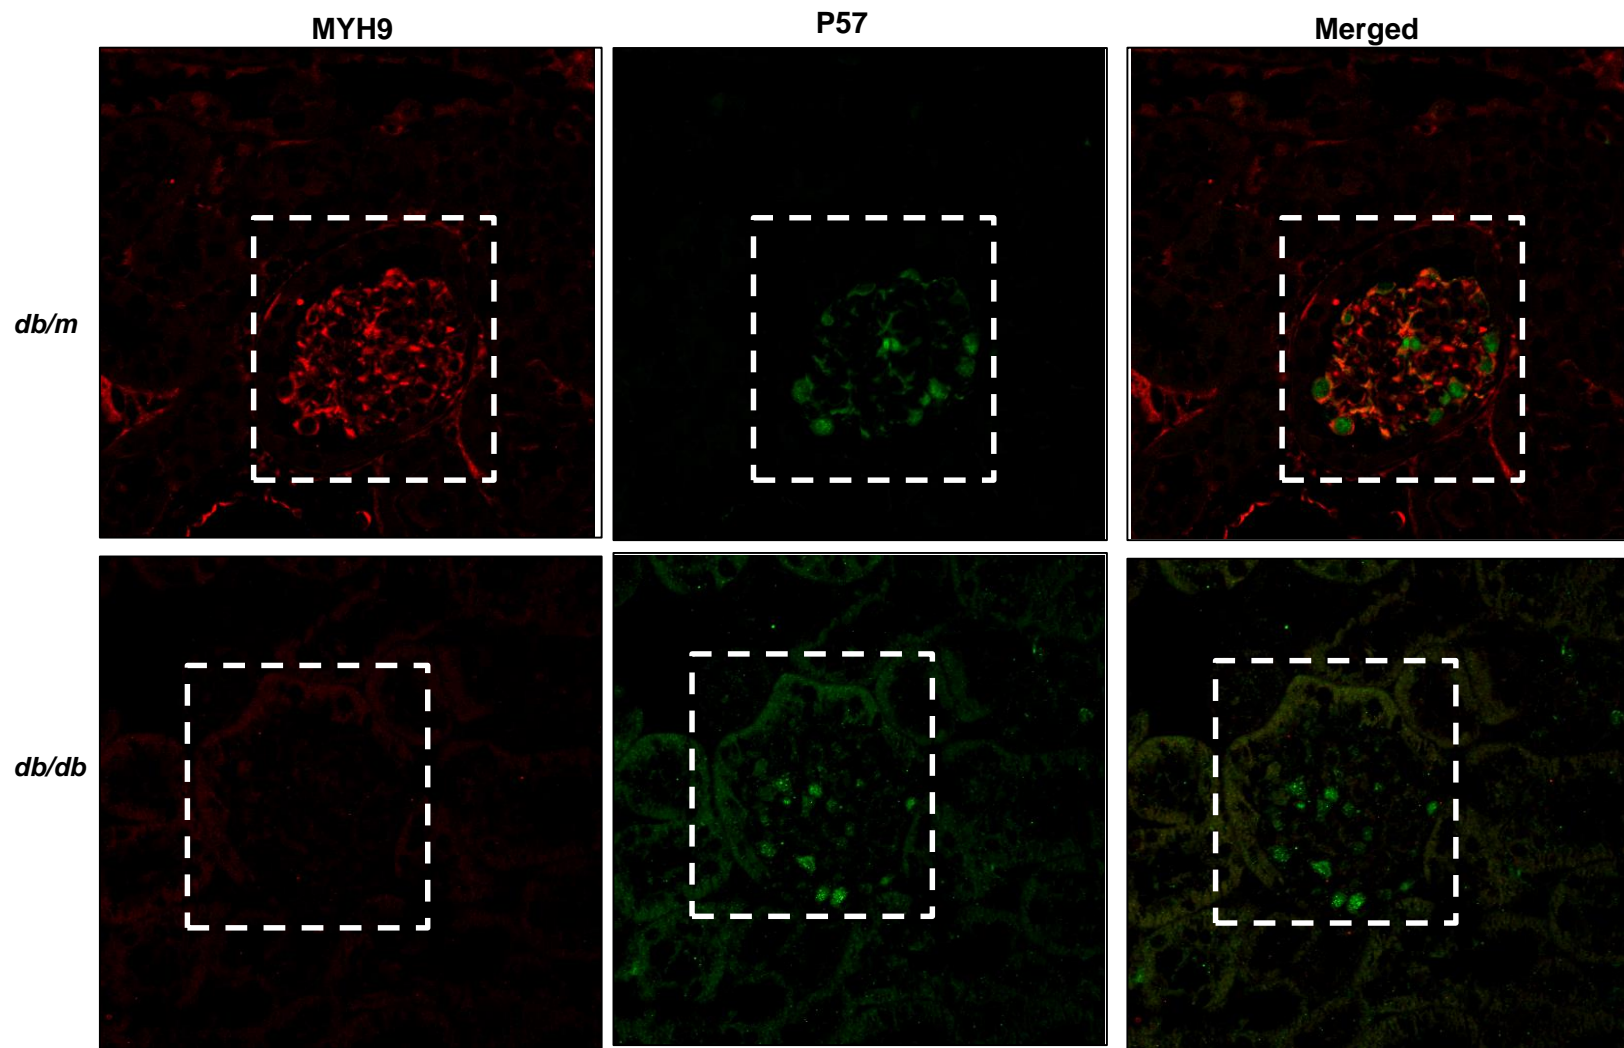

Figure2A

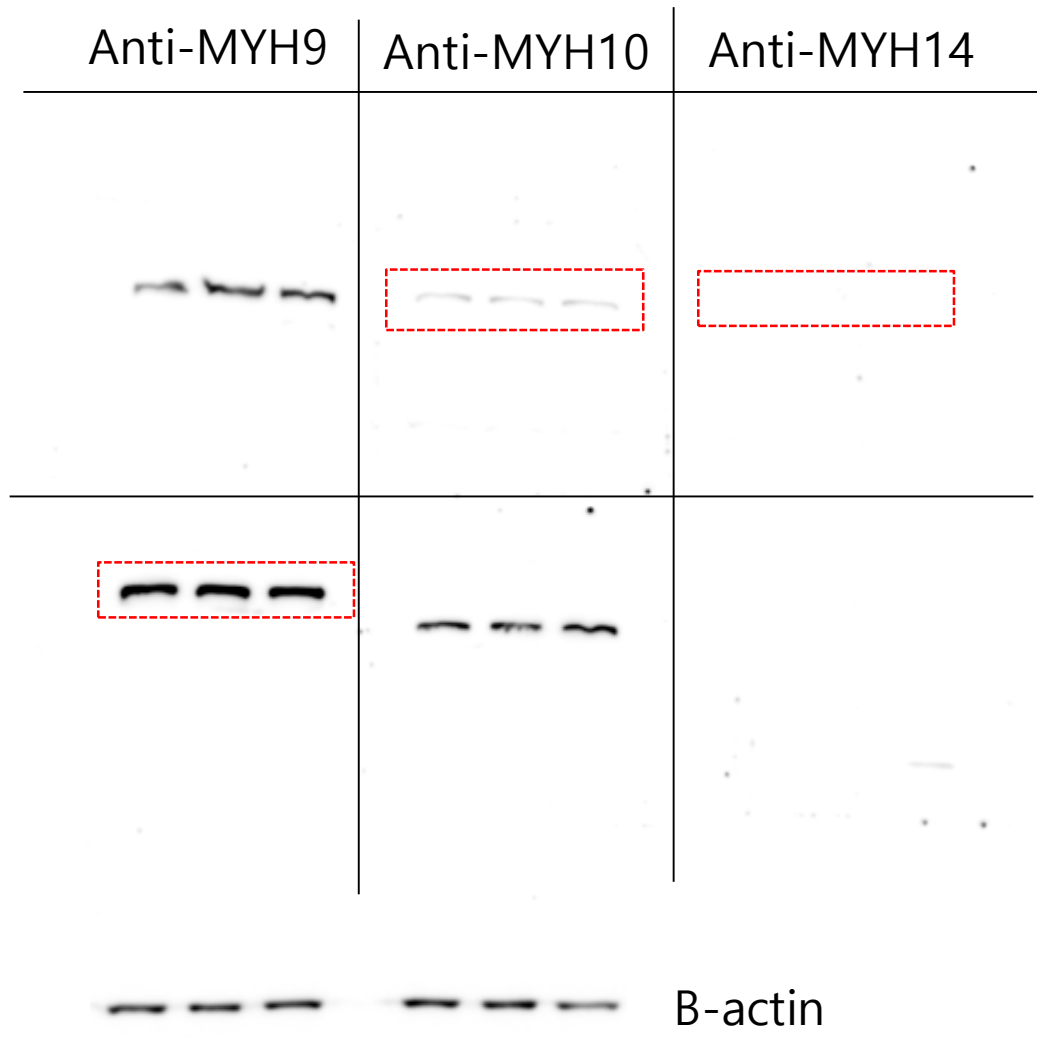

Figure2B

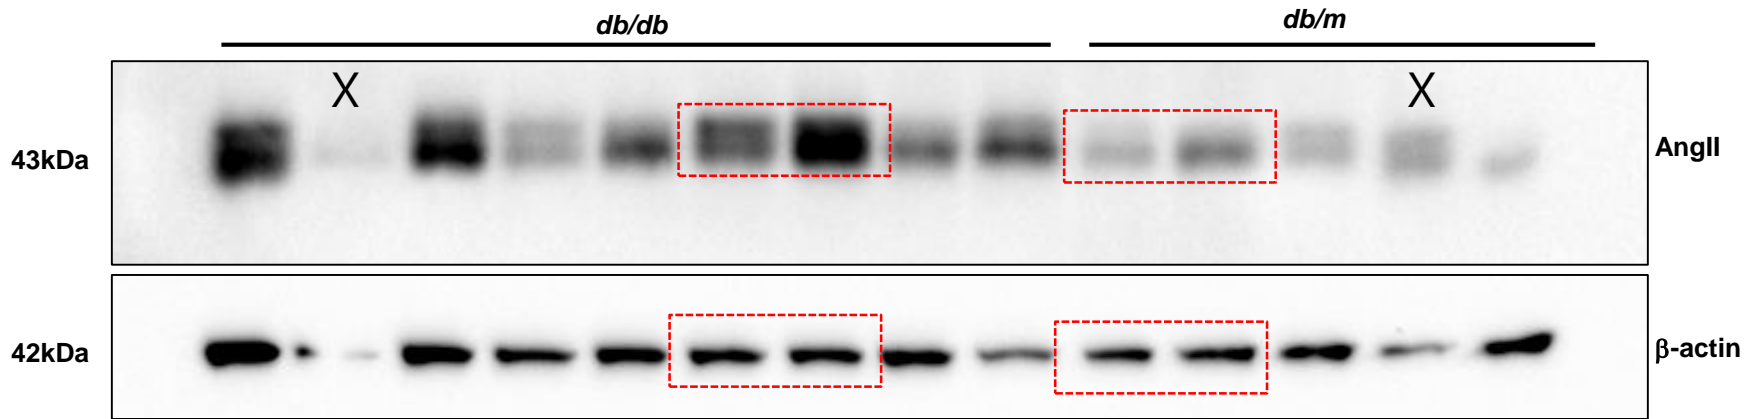

Figure 2E

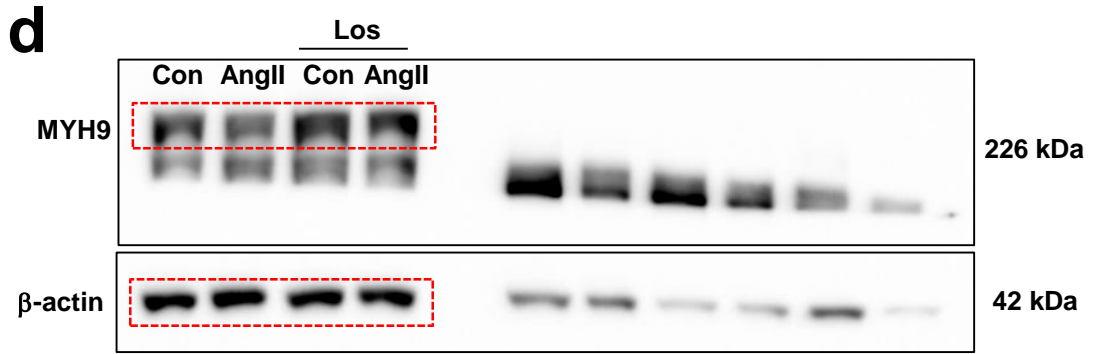

Figure 3B

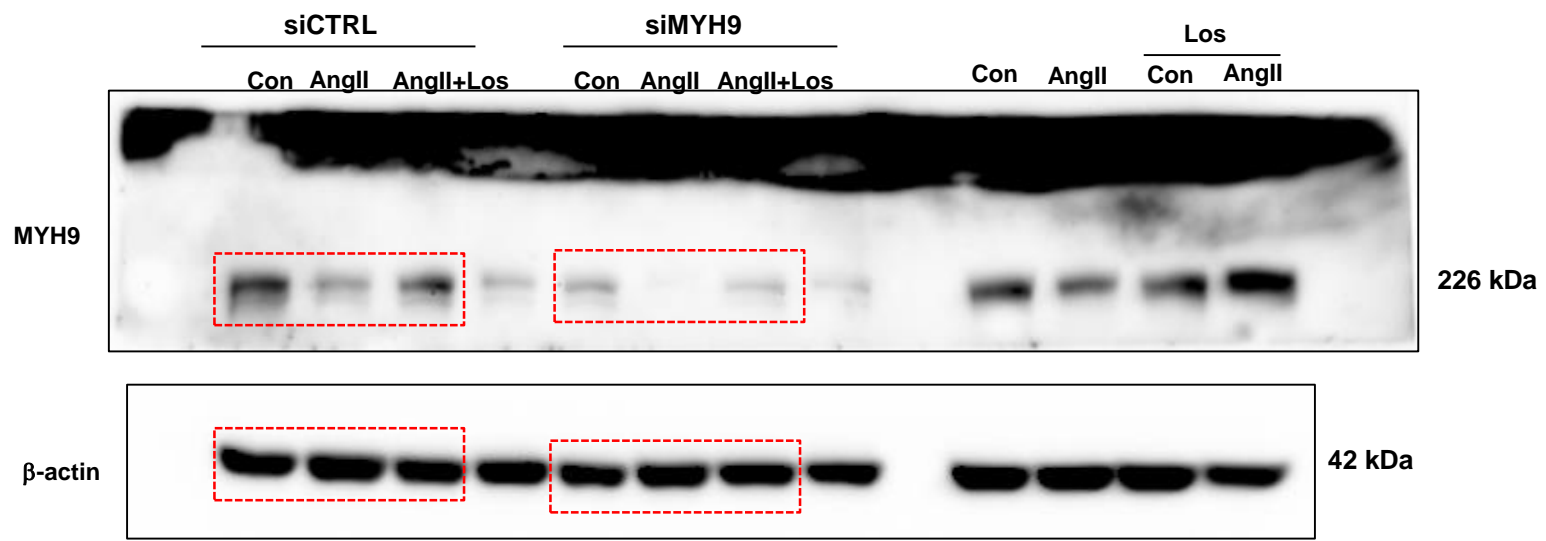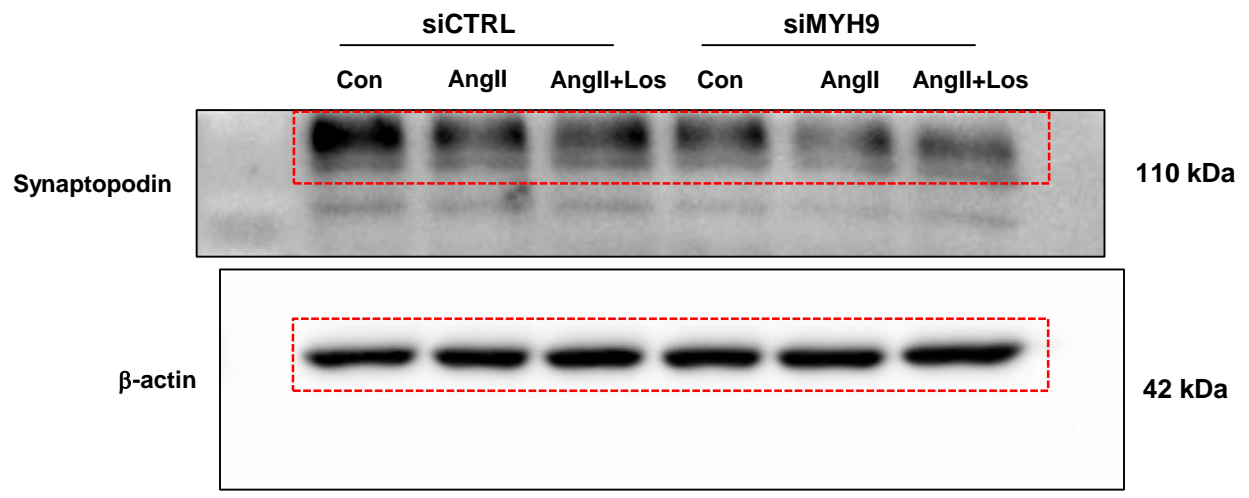

Figure 3C

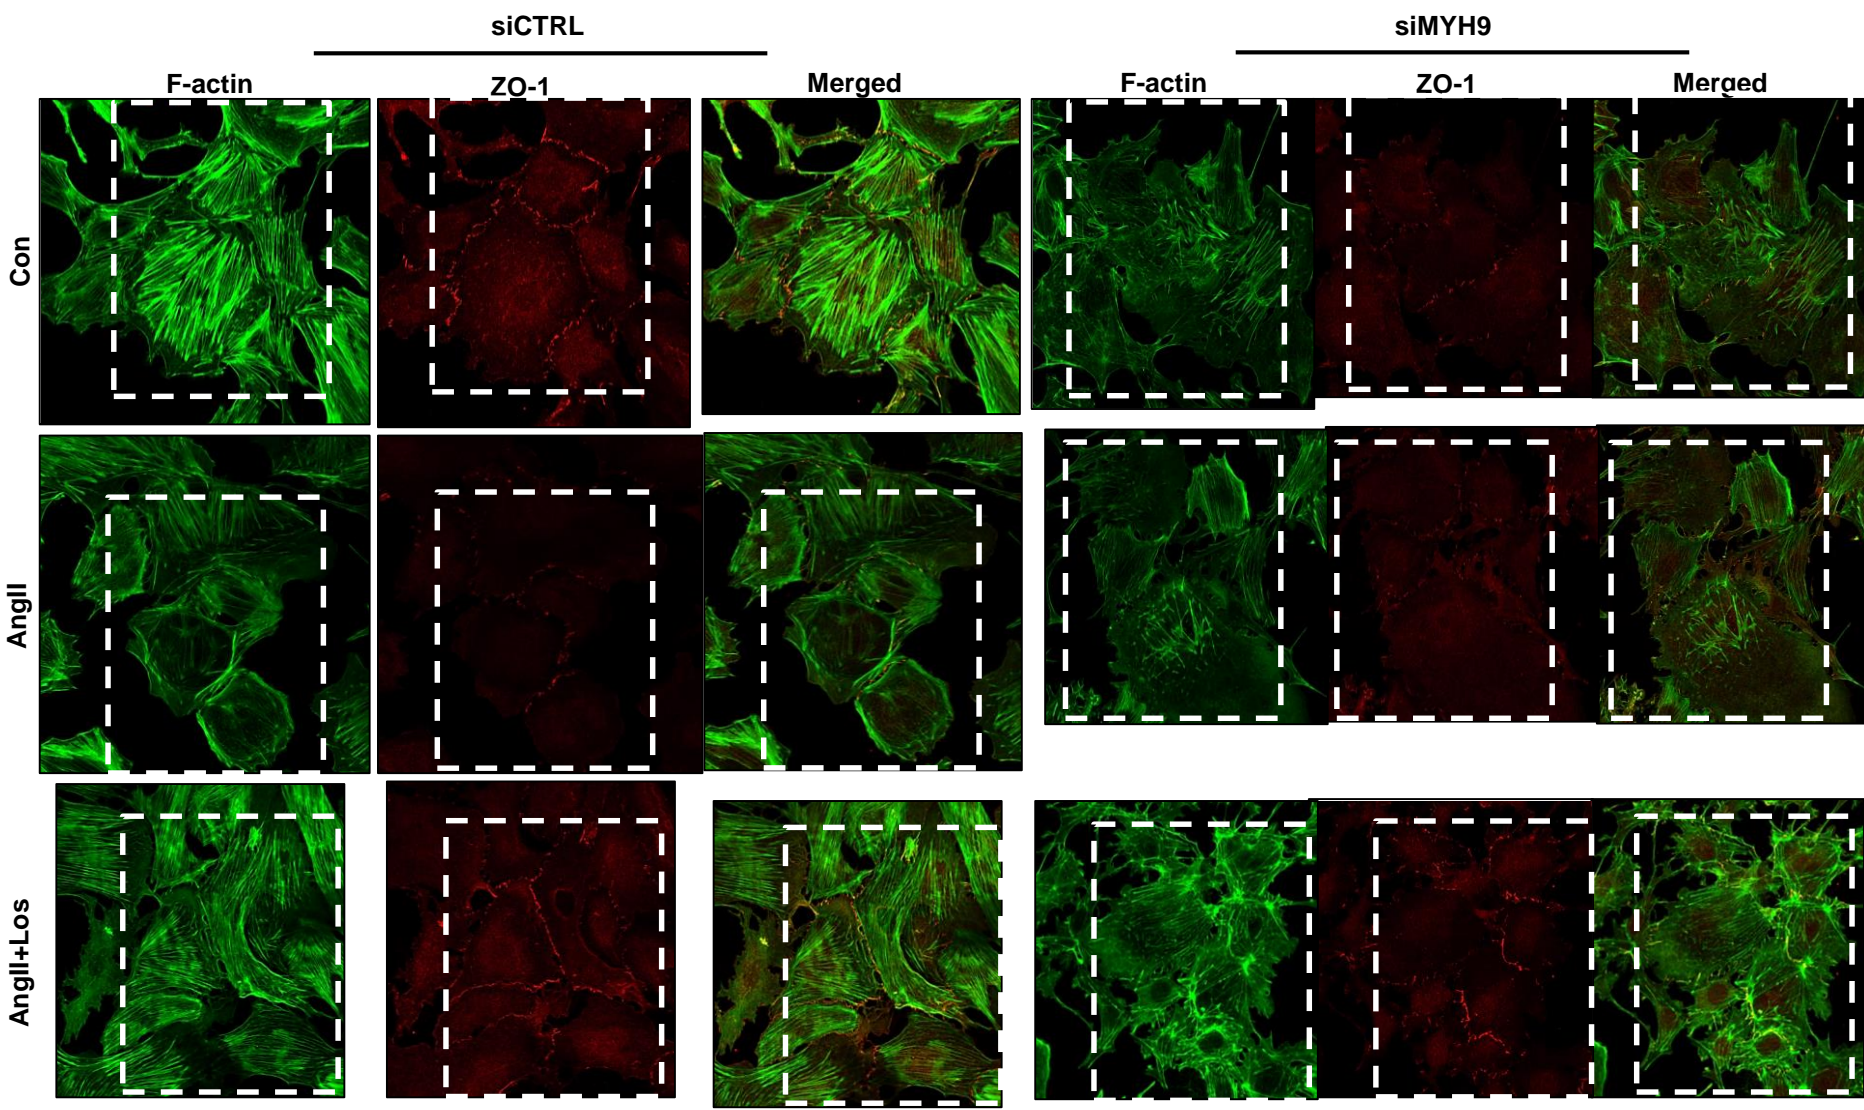

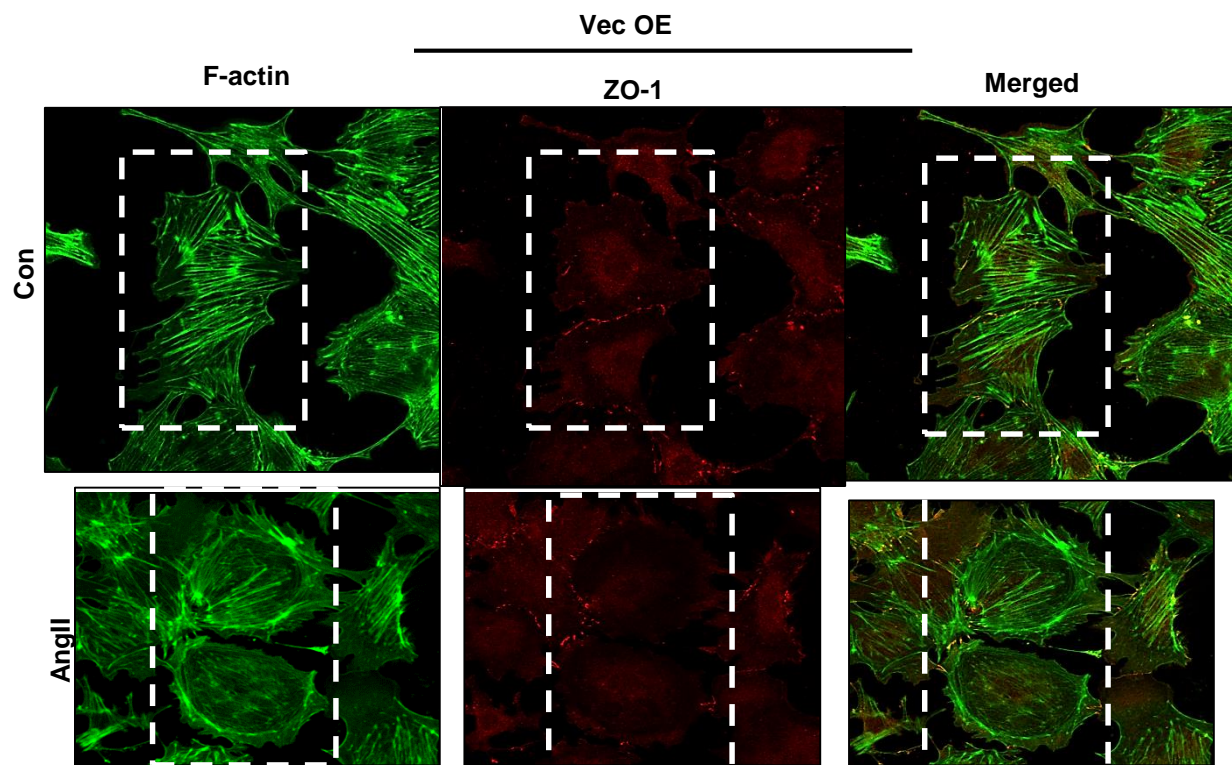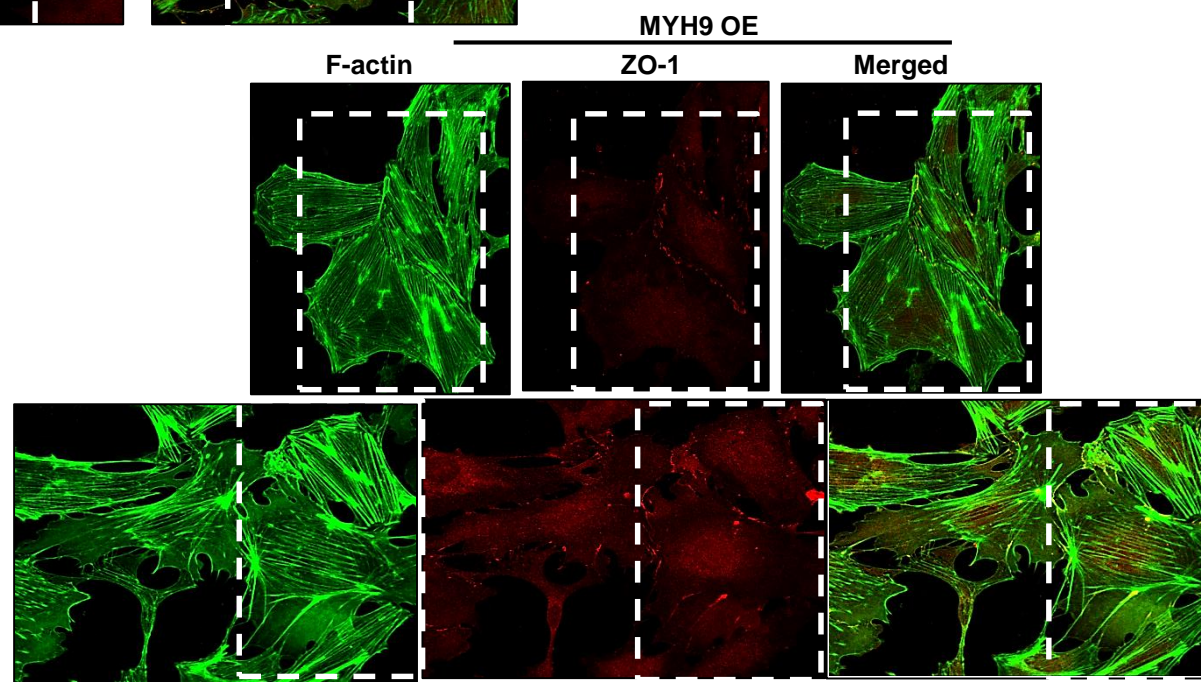

Figure 3D







Figure 5A

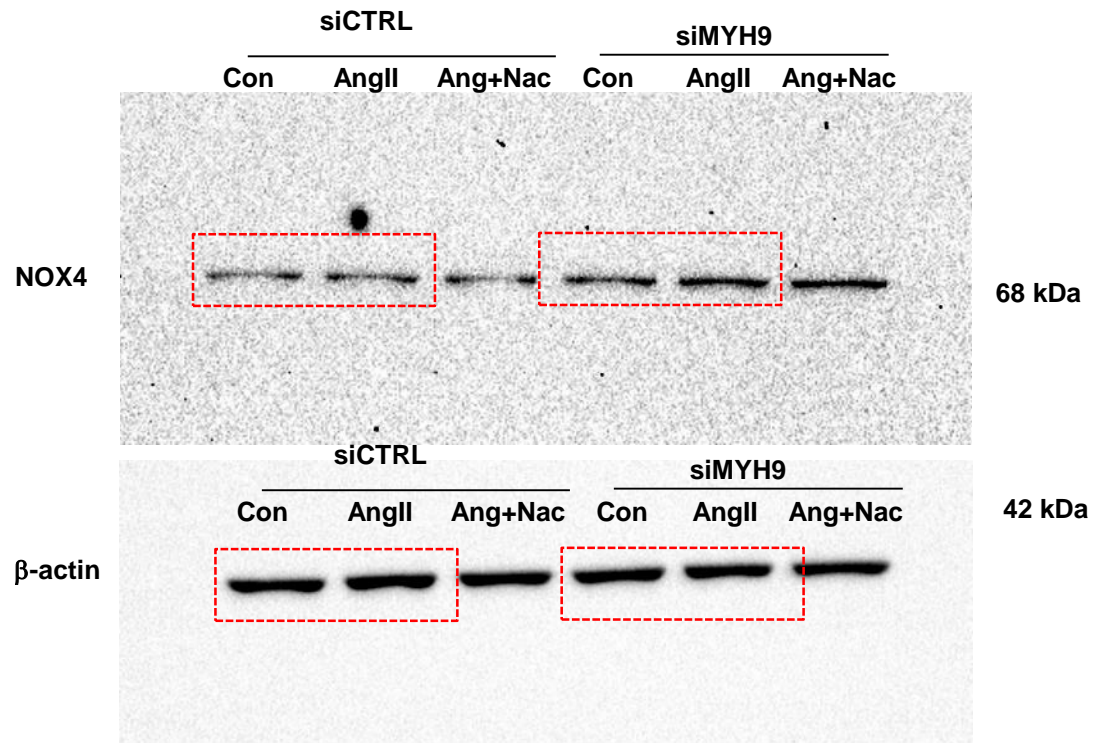

Figure 5C

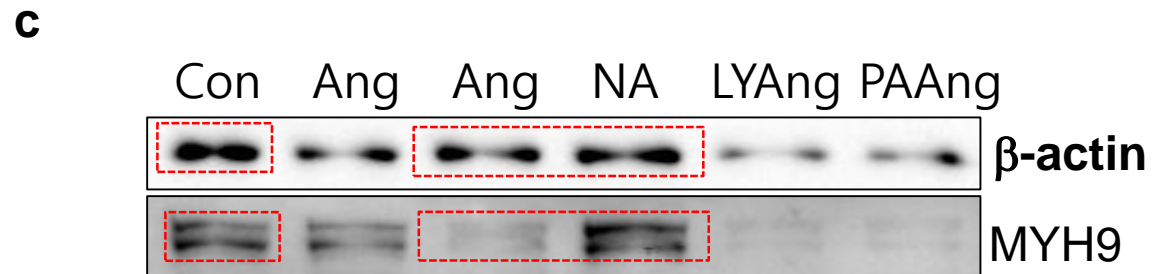

Figure 5D

D

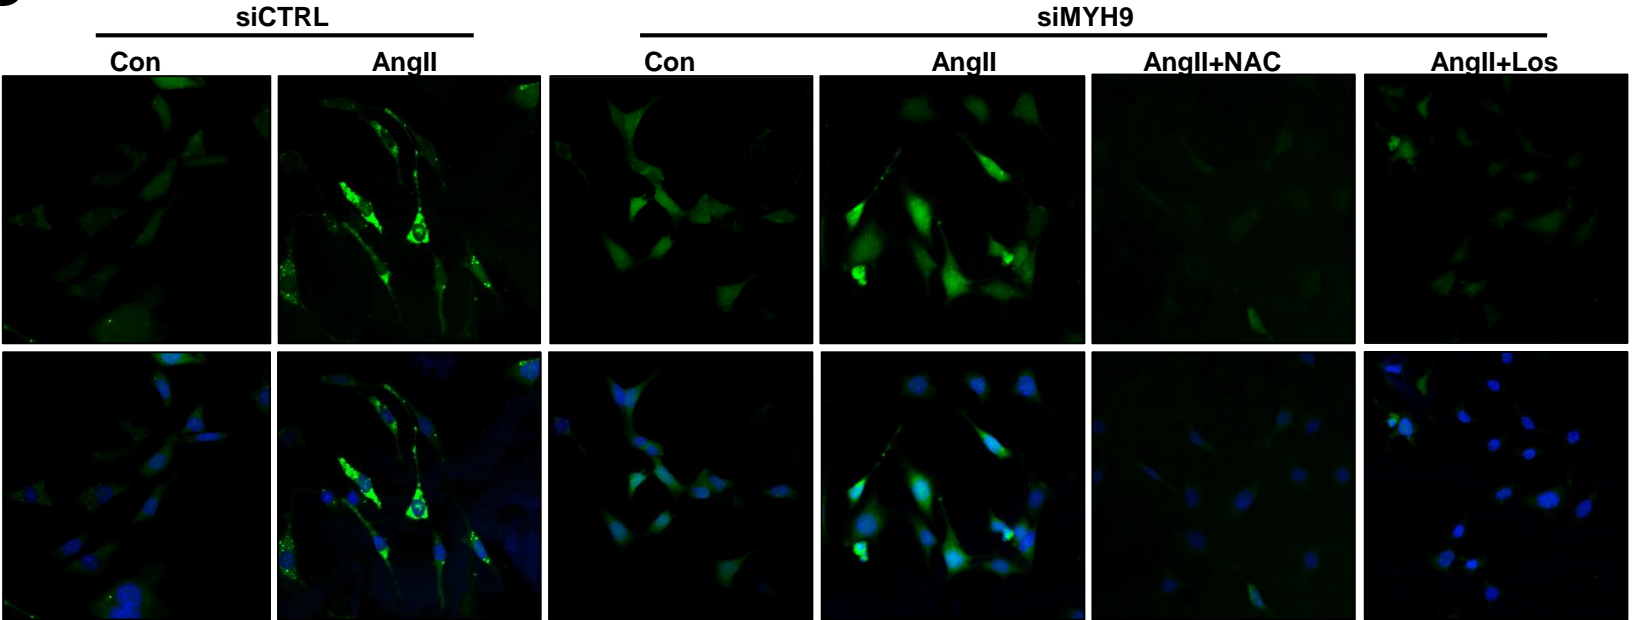

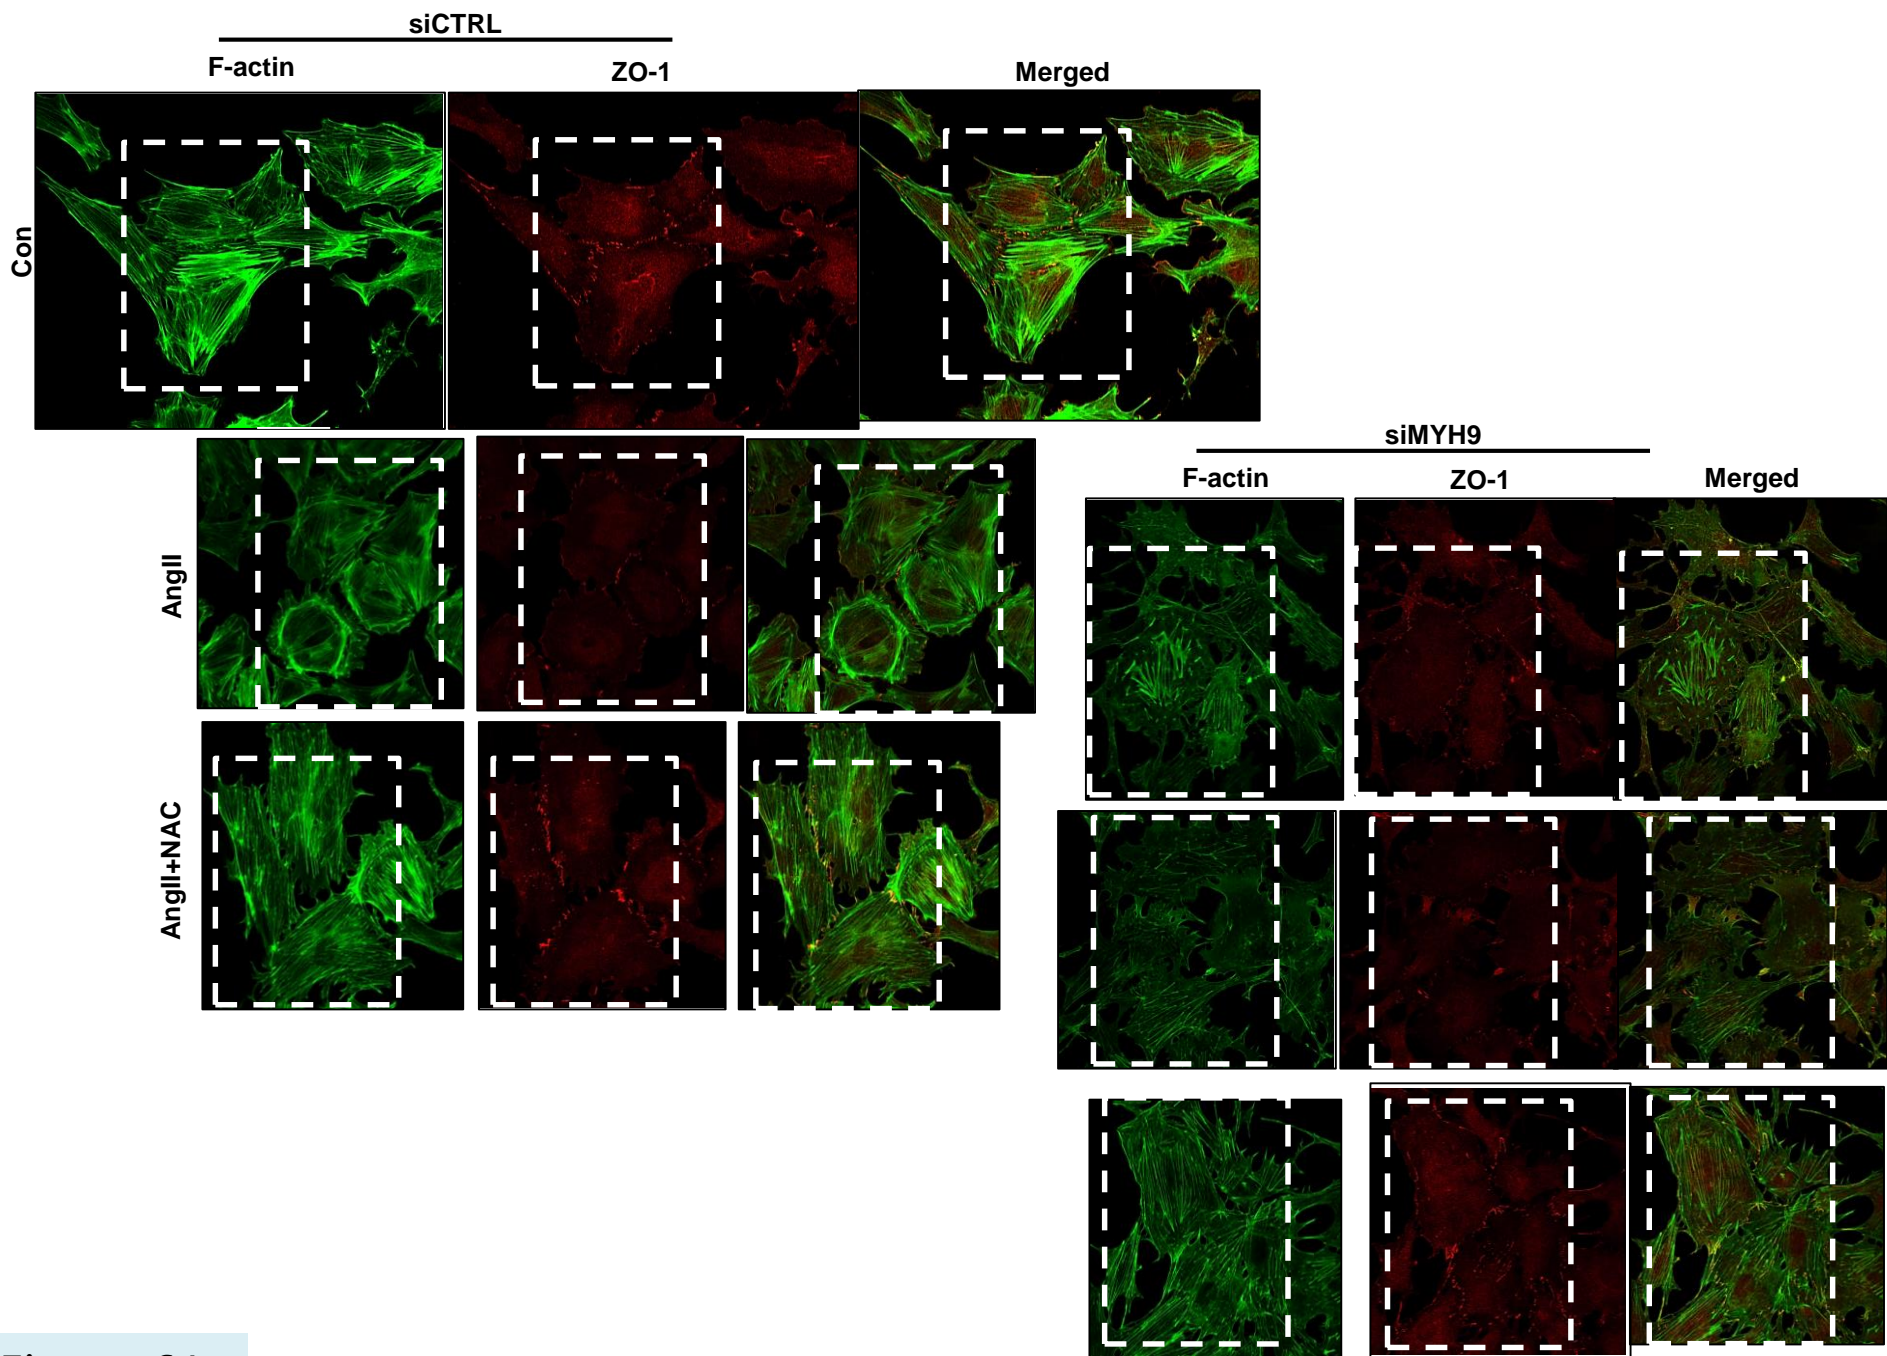

Figure 6A

Figure 8F

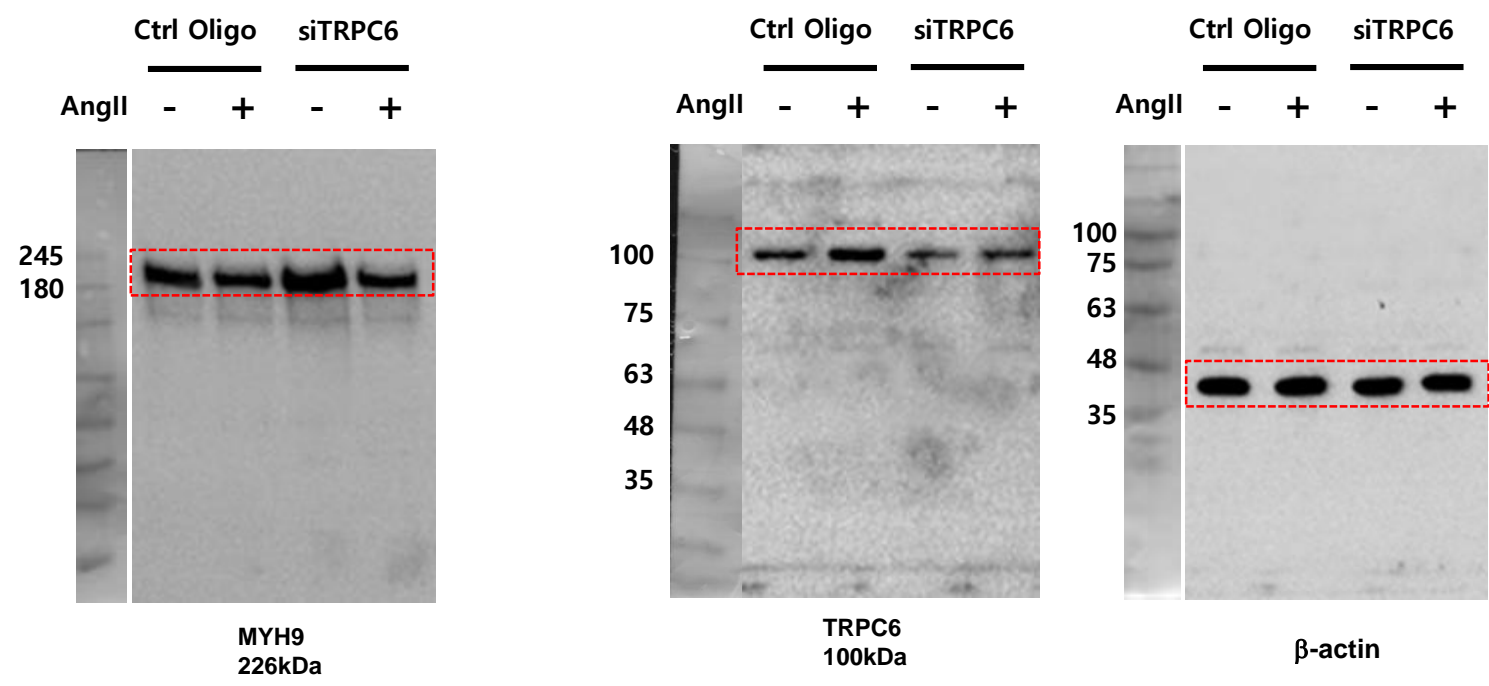

SFigure 1C

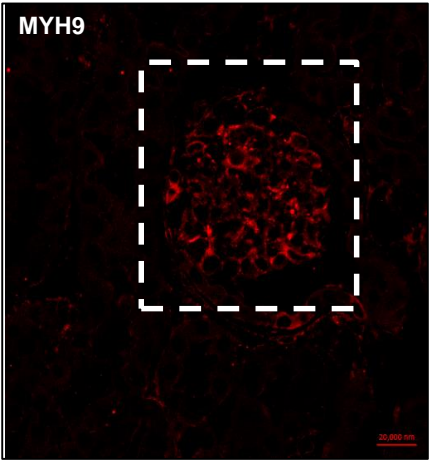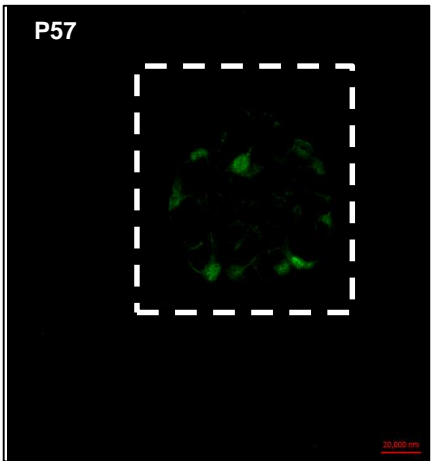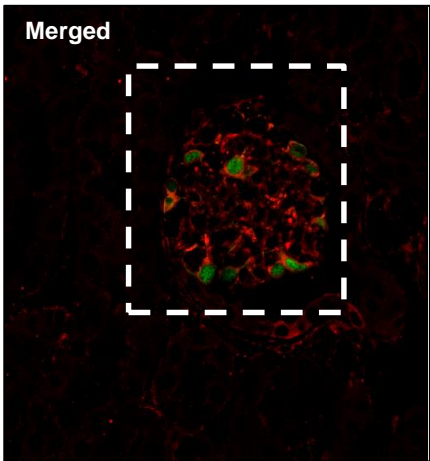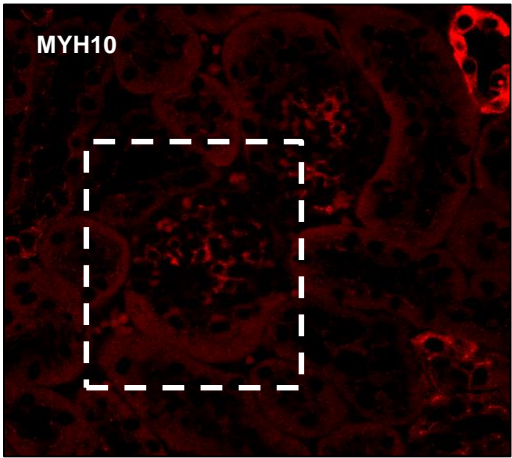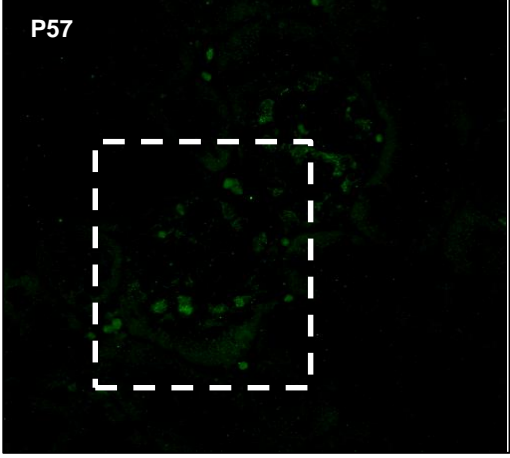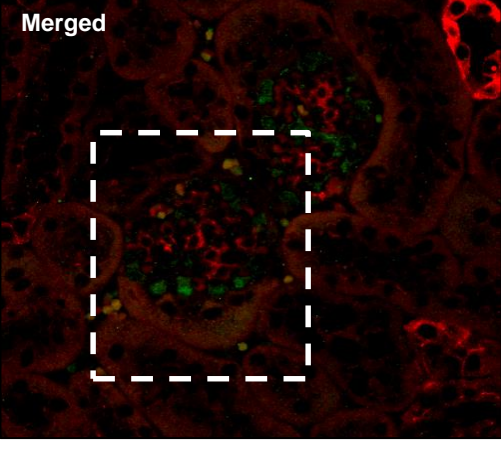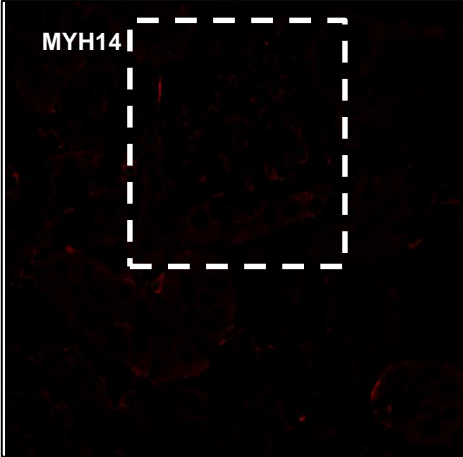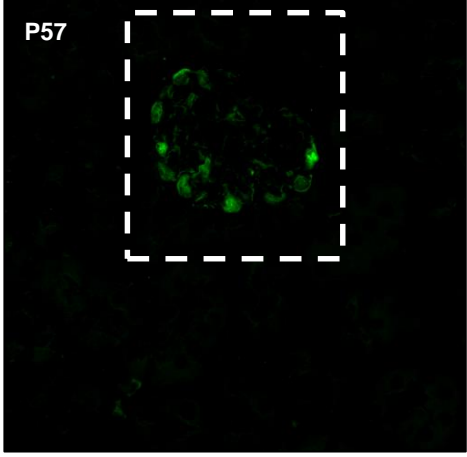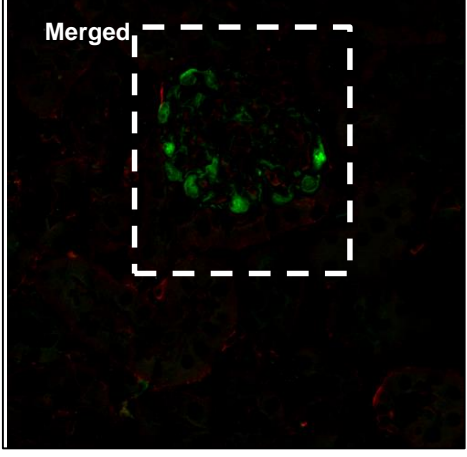

SFigure 2A

Differentiated podocytes

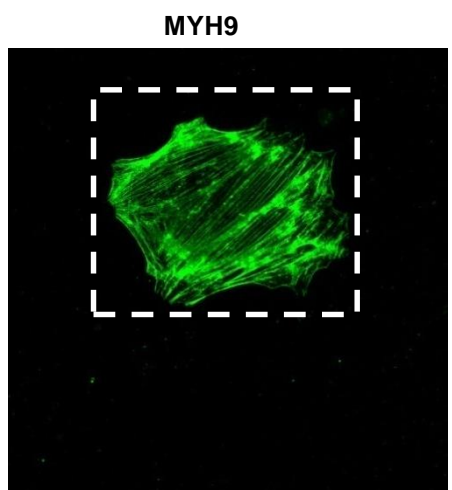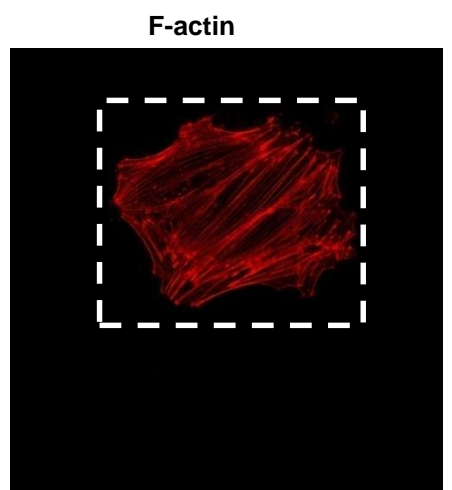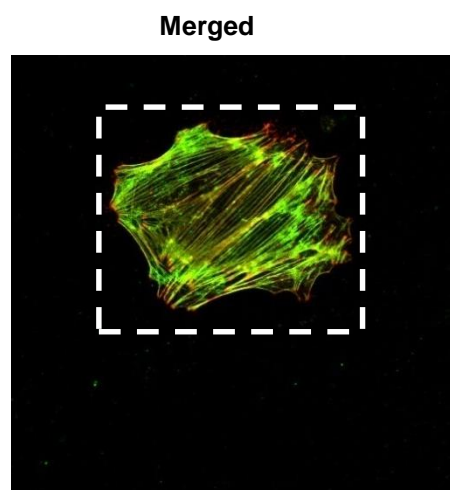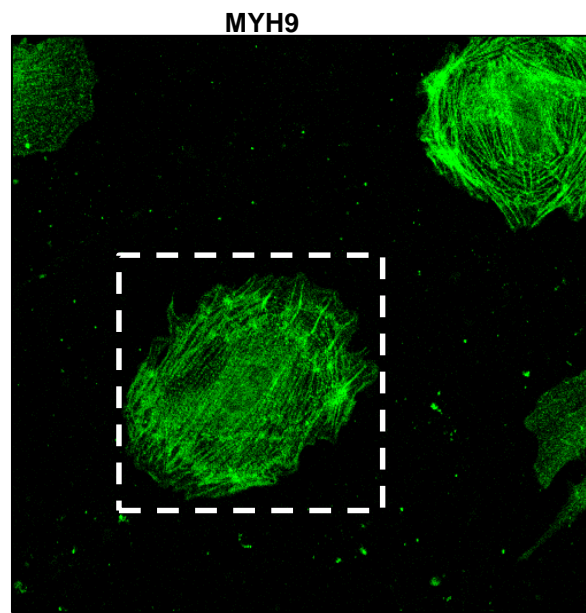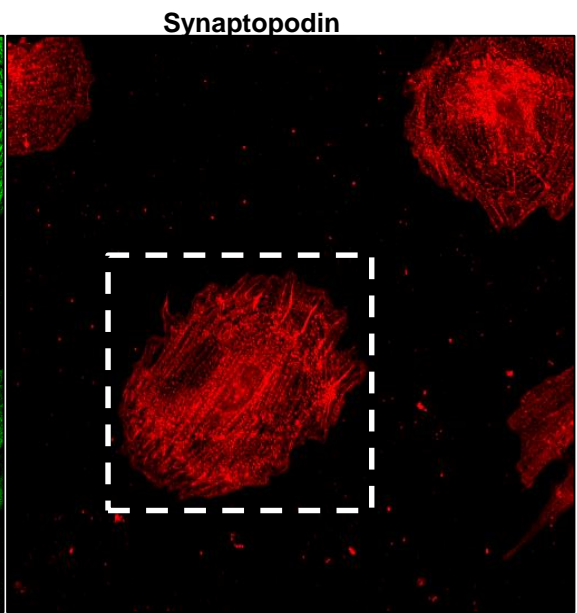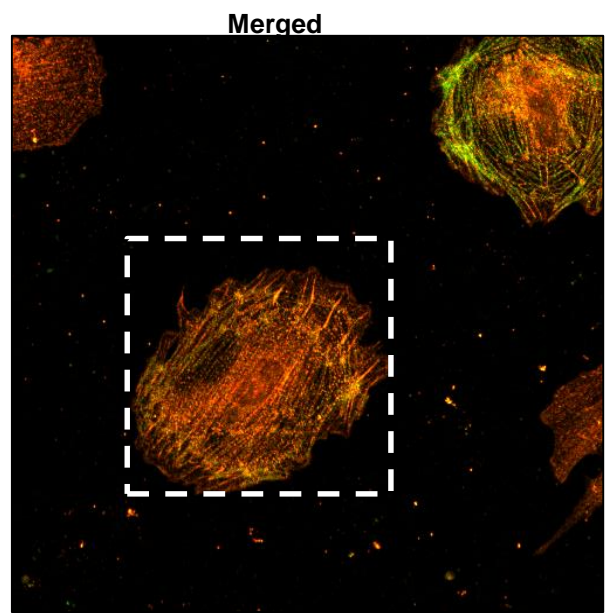



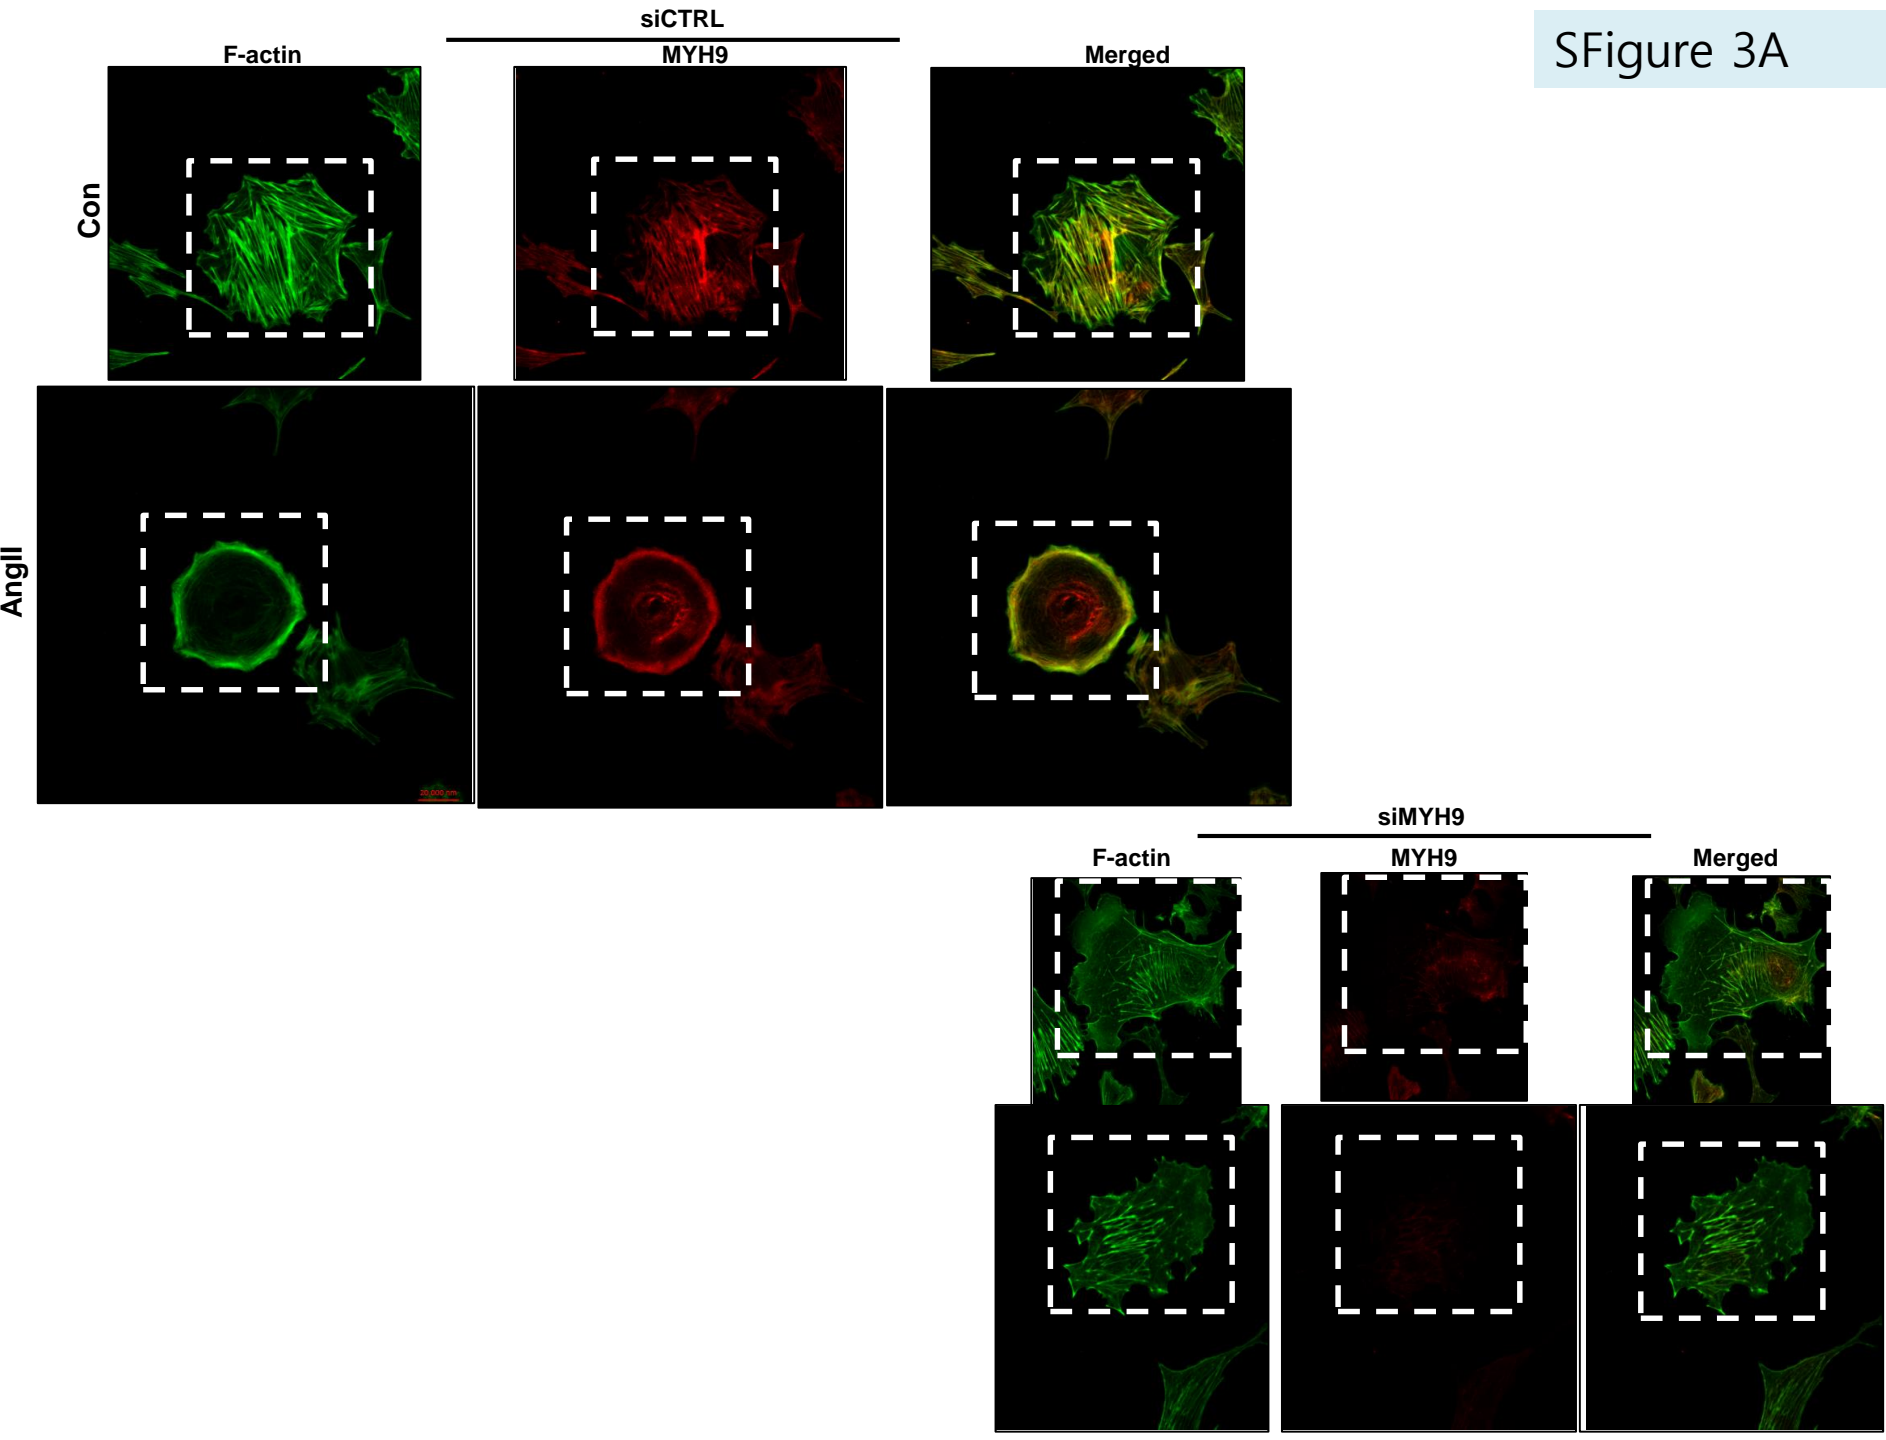

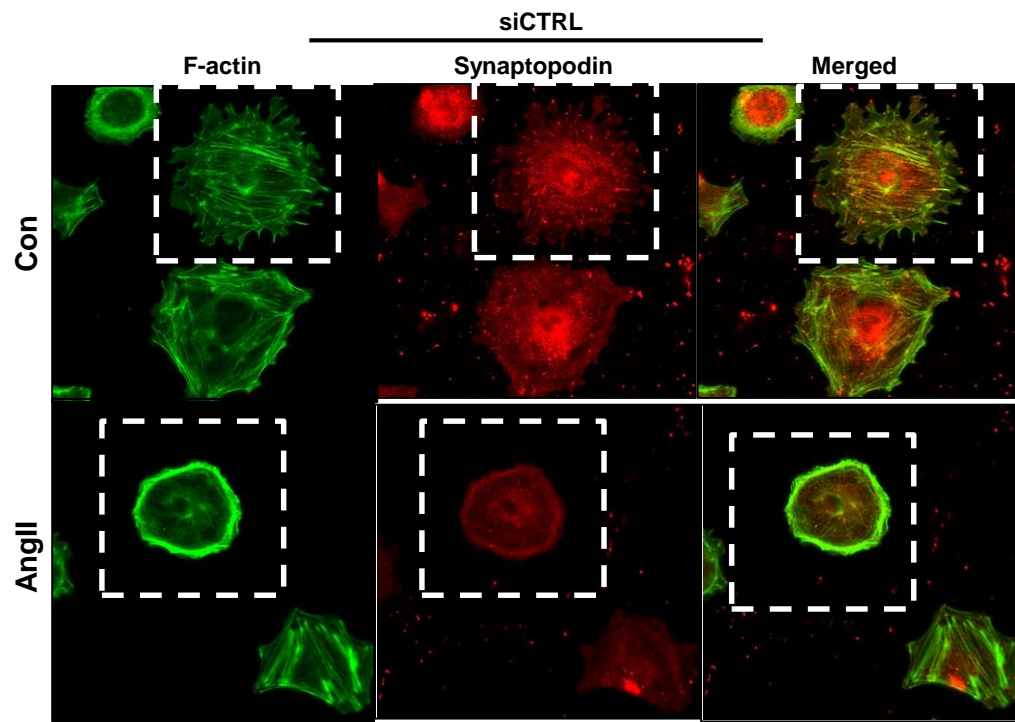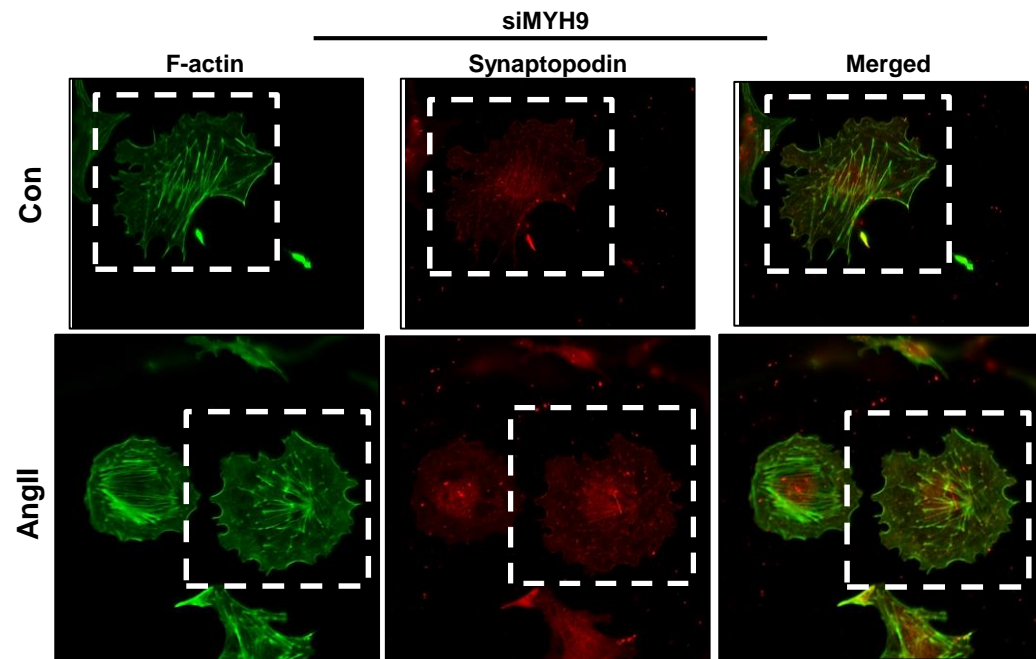

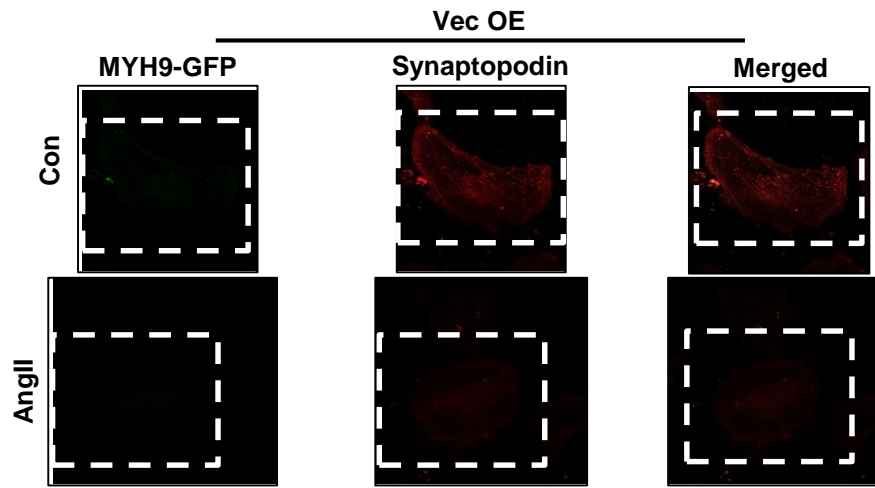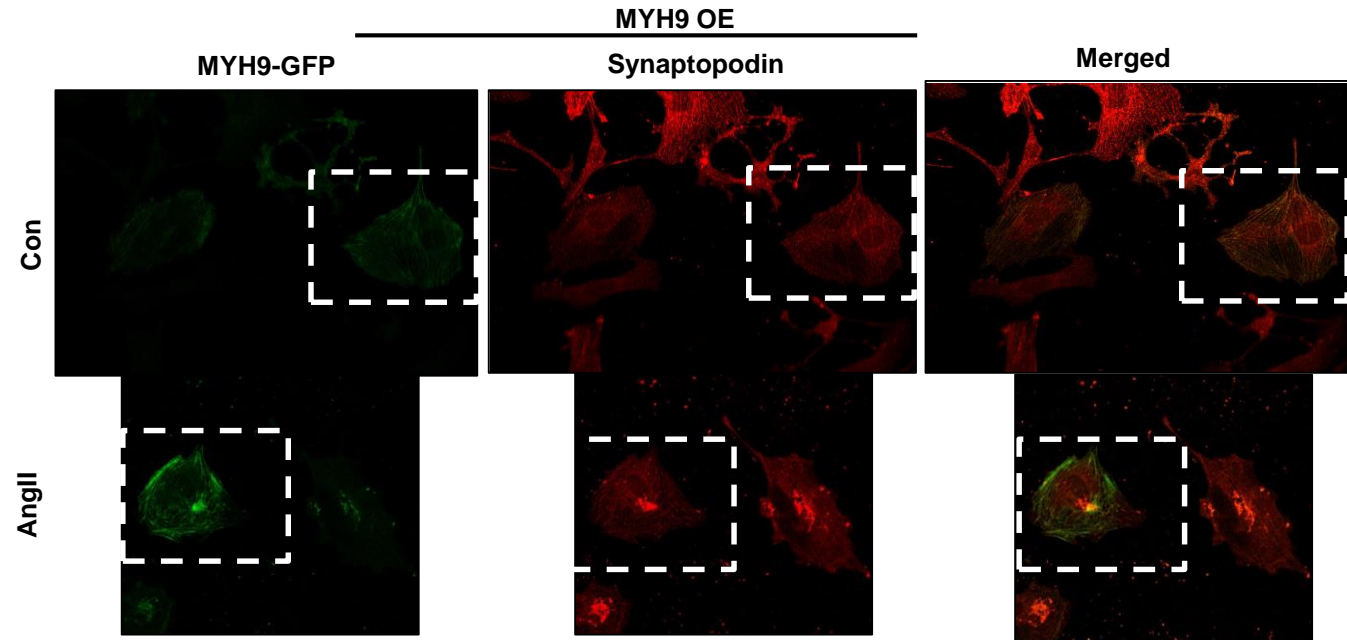

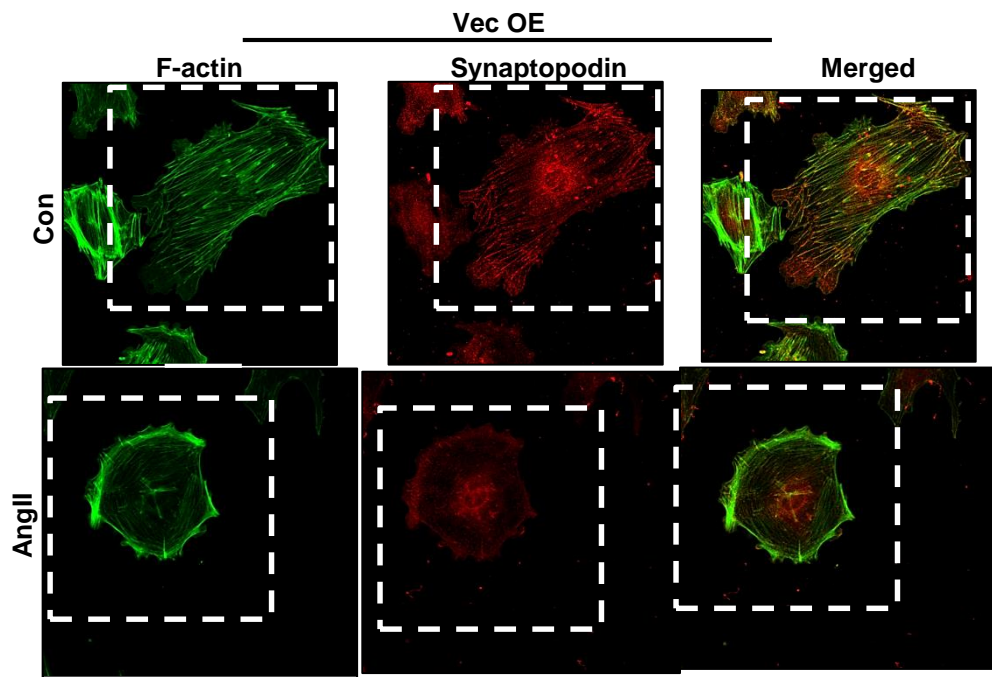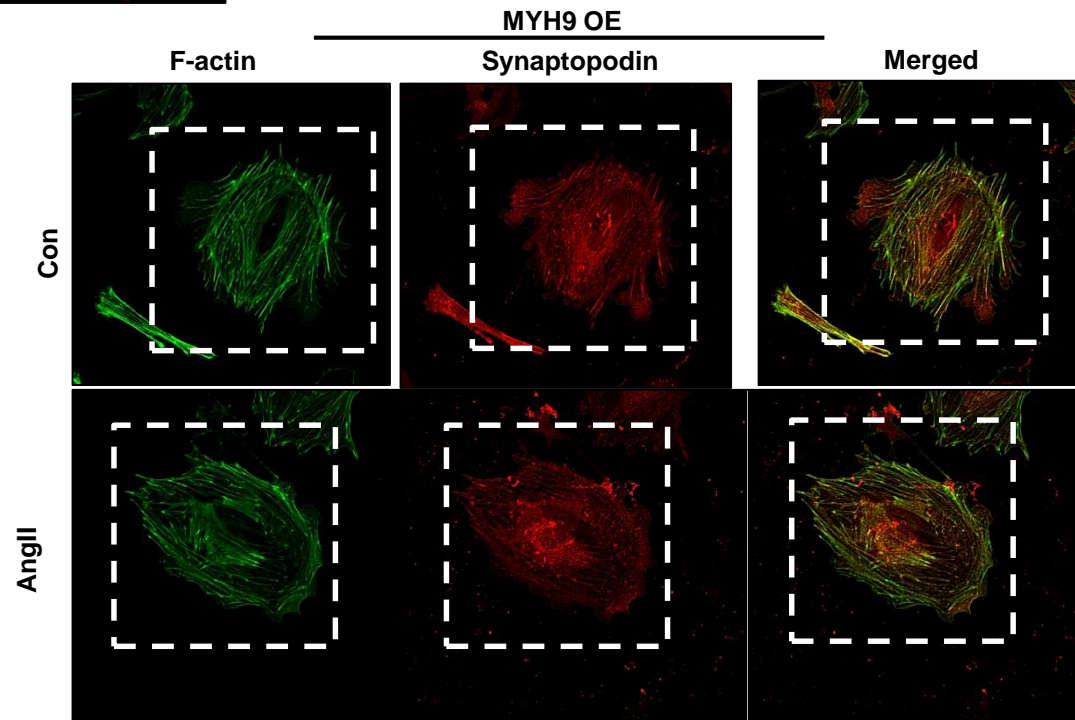

# SFigure 4A

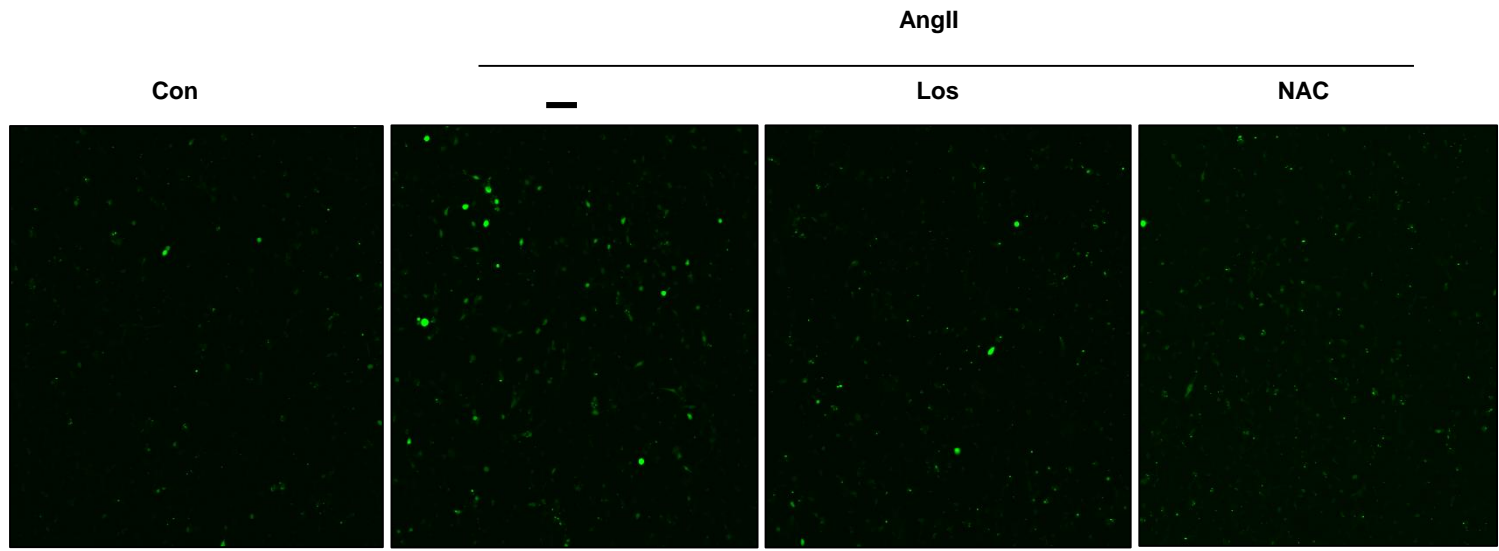

Supplement: 41598_2019_44194_MOESM2_ESM.pdf [file 41598_2019_44194_MOESM2_ESM.pdf]
